# Supplementary material for: Defining Key Genes Regulating Morphogenesis of Apocrine Sweat Gland in Sheepskin
Source: PubMed Central journal article supplement (PMC6363705; doi:10.3389/fgene.2018.00739), 2019-01-30
Supplement: Data_Sheet_1.pdf [file Data_Sheet_1.pdf]

## *Supplementary Material*

# **Defining Key Genes Regulating Morphogenesis of Apocrine Sweat Glands in Sheepskin**

Shaomei Li<sup>1</sup>, Xinting Zheng<sup>1</sup>, Yangfan Nie<sup>1</sup>, Wenshuo Chen<sup>1</sup>, Zhiwei Liu<sup>1</sup>,  
Yingfeng Tao<sup>1</sup>, Xuwen Hu<sup>1</sup>, Yong Hu<sup>2</sup>, Haisheng Qiao<sup>2</sup>, Quanqing Qi<sup>3</sup>,  
Quanbang Pei<sup>3</sup>, Danzhuoma Cai<sup>4</sup>, Mei Yu<sup>1</sup> and Chunyan Mou<sup>1\*</sup>

**\*Correspondence:**

Chunyan Mou

[chunyanmou@mail.hzau.edu.cn](mailto:chunyanmou@mail.hzau.edu.cn)

### **1 Supplementary Figures**

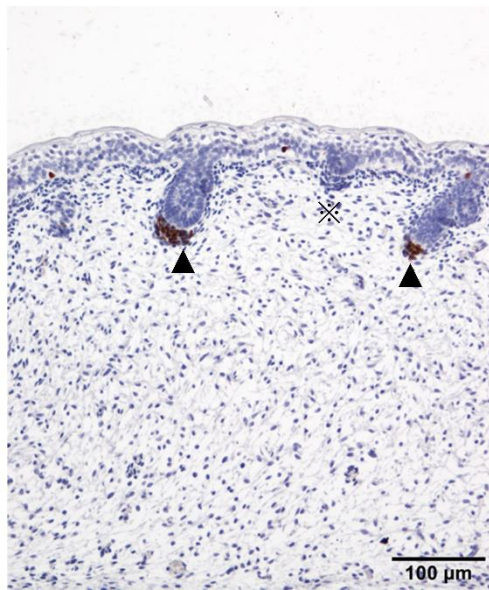

**Supplementary Figure 1** SOX2 is exclusively expressed in dermal condensates of primary wool follicles, not in secondary wool follicles.▲, primary wool follicle; ✖, secondary wool follicle.

**Supplementary Table 1** Differentially expressed transcripts between stage TF2a and stage TF1b of apocrine sweat gland induction in carpet wool sheep fetal skin.

**Supplementary Table 2** Significantly enriched GO terms of differentially expressed genes.

**Supplementary Table 3** Significantly enriched KEGG pathways of differentially expressed genes.
